# Supplementary material
Source: PubMed Central journal article supplement (PMC4713391)

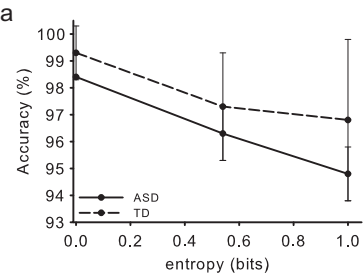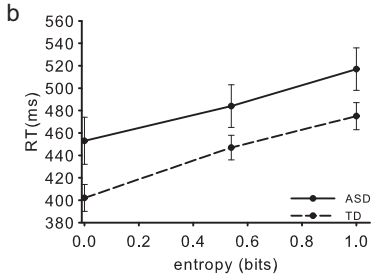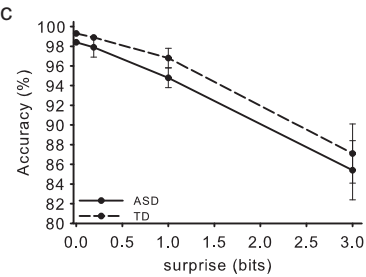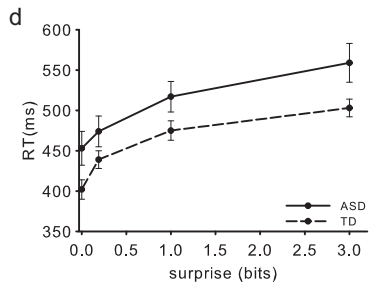

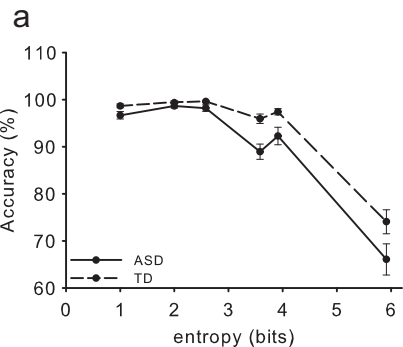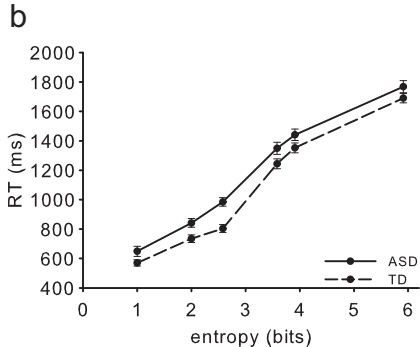

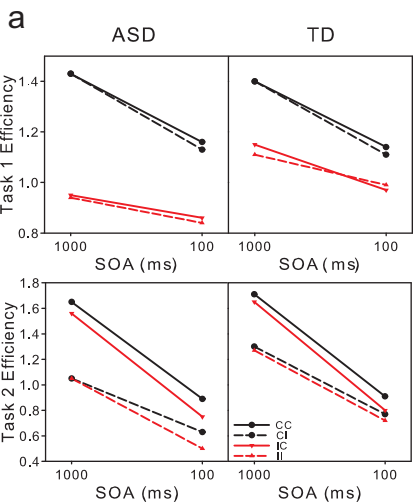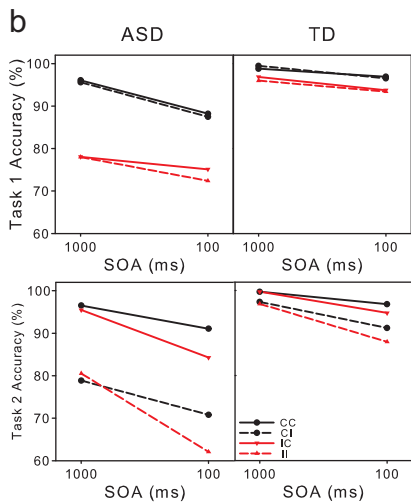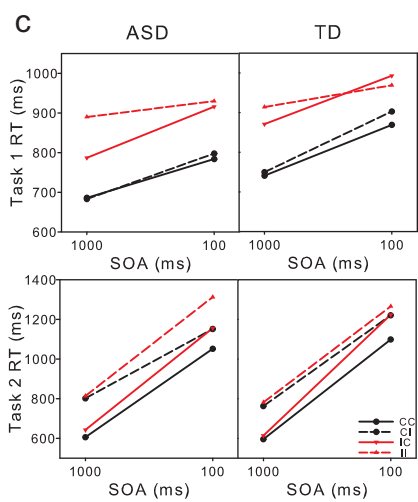

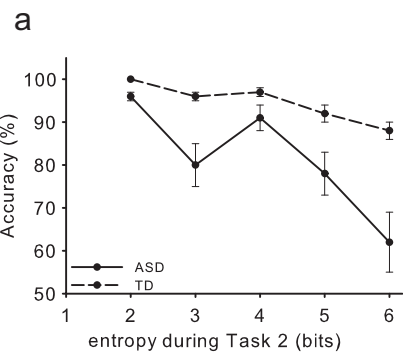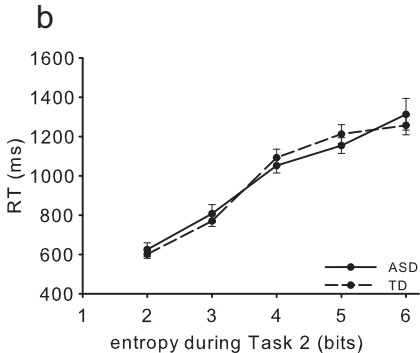

Supplement: NIHMS702125-supplement-Supp_FigureS1-S4.pdf [file NIHMS702125-supplement-Supp_FigureS1-S4.pdf]
